ExM-STORM: Expansion Single Molecule Nanoscopy

# ExM-STORM: Expansion Single Molecule Nanoscopy

Zhisong Tong<sup>\*</sup>, Paolo Beuzer<sup>\*</sup>, Qing Ye<sup>§</sup>, Joshua Axelrod, Zhenmin Hong, and Hu Cang<sup>#</sup>

Waitt Advanced Biophotonics Center, Salk Institute for Biological Studies, 10010 N. Torrey Pines Road, La Jolla, CA 92037

<sup>\*</sup> These authors contribute equally to this manuscript.

<sup>§</sup> The Key Laboratory of Weak-Light Nonlinear Photonics, MOE, School of Physics and TEDA Applied Physics School, Nankai University, Tianjin 300071, China

<sup>#</sup> Correspondence and requests for materials should be addressed to [hucang@salk.edu](mailto:hucang@salk.edu).

## Abstract

Recently, Chen *et al.* invented Expansion Microscopy, or ExM, which imprints a specimen's features of interest onto a polymer hydrogel network and expands the network homogeneously to magnify sub-diffraction-limit features. However, ExM bleaches massively, 50-100% of the fluorescent molecules; thus it is not suited for single-molecule imaging. Here, we describe improved ExM that is free of bleaching, and thus can be synergically integrated with single-molecule nanoscopy, STORM.

## ExM-STORM: Expansion Single Molecule Nanoscopy

Recently, Chen<sup>1</sup> *et al.* demonstrated a novel approach to overcome the long-standing challenge of diffraction limit in light microscopy. Rather than improving the optics of a microscope<sup>2,3</sup> or using photo-controllable fluorescent dyes<sup>4,5</sup>, they proposed to expand specimens mechanically to magnify sub-diffraction-limit features. To ensure that the expansion would be isotropic, they developed a method to imprint a specimen's features of interest onto a polymer network, and then expand the network homogeneously.

Fig. 1a illustrates the expansion procedure. Fixed and permeabilized cells are stained with antibodies conjugated with a short, 20-50 bp, single strand DNA oligonucleotide. The DNA oligonucleotide is then hybridized to a tri-functional label, comprising a methacryloyl group at the 5' end, capable of participating in polymer network polymerization, a fluorophore at 3' end, and a single strand oligonucleotide complementary to the sequence conjugated on the antibodies. The cells are then immersed into a monomer solution of high ionic strength (1X phosphate buffer saline (PBS), 2M NaCl, 8.625% (w/w) sodium acrylate, 2.5% (w/w) acrylamide, 0.15% (w/w) N, N'-methylene-bis-acrylamide). Polymerization is then initiated by ammonium persulfate (APS) with tetra-methyl-ethyl-enediamine (TEMED). The tri-functional labels are covalently linked to the polymer network during the polymerization. After the antibodies are digested by protease K, dissociating the tri-functional labels from the specimens, the polyacrylamide hydrogel is expanded by dialysis in a low ionic strength buffer or de-ionized water. Typically, the gel expands by 3 to 4 folds. Thus, nanometer scale features stamped on the polymer network are magnified and become resolvable even under a diffraction-limited microscope. This method, termed Expansion Microscopy, or ExM, could enhance the lateral resolution of a confocal microscope to ~70 nm. On the other hand, single-molecule imaging Stochastic Optical Reconstruction Microscopy (STORM/*direct*STORM) has become a popular tool to visualize molecular scale features of a specimen<sup>4,6-8</sup>. While the resolution of STORM can reach a level of sub-10 nanometers<sup>9,10</sup>, the achievable resolution could be severely degraded by many factors such as the amount of sample drift during data acquisition<sup>11</sup>, bleaching of fluorescence dyes<sup>12</sup>, overlapping of multiple blinking events<sup>13-15</sup>, density of labeling<sup>16</sup>, level of background noise<sup>12</sup>, thickness of a sample<sup>17,18</sup>, amount of optical aberrations<sup>19</sup>, and accuracy of the image reconstruction algorithm<sup>20</sup>. Therefore, integrating ExM with STORM – expanding a sample mechanically and magnifying the features of interest first, and then visualizing the sample with STORM – would help achieve high resolution in practicality.

However, fluorescence dye molecules are massively bleached during polymerization of the polymer network<sup>1</sup>. The bleaching is particularly severe for Alexa647, Cy5 and Cy3B; some of the most commonly used photo controllable fluorescence dyes for single molecule imaging. Fig. 1b to g show that, using microtubules in U2OS cells as a demonstration, nearly 100% of Alexa647 and Cy3B molecules are bleached in the ExM samples (Fig. 1c and f). Since sufficient blinking events are critical to reconstruct a super-resolution image<sup>21</sup>, performing STORM on expanded samples is not possible.

We report here improvements of ExM that circumvent the bleaching of fluorophore. Since the radicals generated during the polymerization step are responsible for the bleaching<sup>1</sup>, the bleaching could be overcome if the dyes are introduced to the samples after the polymerization. To achieve this we developed two strategies. The first one exploits

## ExM-STORM: Expansion Single Molecule Nanoscopy

biotin/streptavidin binding (Fig. 1h). We replaced the 3' fluorophore modification in the original ExM tri-functional label with a biotin. Two hours after the polymerization, when the crosslinking is finished and free radicals are consumed, the polymer gel is incubated with a solution of Alexa647 or Cy3B conjugated streptavidin for up to 48 hours to bind the dyes to the tri-functional label.

Because the polymer network traps unconjugated fluorophores, to wash them out would take a few days; we developed an efficient washing procedure based on electrophoresis to wash away the unconjugated fluorophores for single-molecule imaging. The polymer network is embedded in a 0.8% agarose gel placed in a horizontal gel box filled with 1X Tris/Borate/EDTA buffer (TBE). The electrophoresis is run at 100V. We use a fluorescence gel imaging system (Syngene Pxi6) to monitor the level of residual unconjugated fluorophore in the sample. The electrophoresis is continued until the unbound dye is not detectable, which typically takes about 45-60 minutes. After retrieving from the agarose gel, the sample is expanded following the standard ExM procedure<sup>1</sup>. Fig. 1d and g show that the post staining completely prevents bleaching; the fluorescence intensity of the expanded samples post stained with Alexa647 (Fig. 1d) and Cy3B (Fig. 1g) reaches a similar level to the intensity of non-expanded samples (Fig. 1b and e).

For multi-color super-resolution imaging, we developed a second post-polymerization staining method (Fig. 1i). A methacryloyl group was added to the 5' end of the single strand DNA oligonucleotides whose 3' end was conjugated to the antibodies. During the polymerization step, the oligonucleotides were covalently cross-linked to the polymer hydrogel network through the methacryloyl group. After the steps of proteinase K digestion and expansion of the polymer hydrogel, the oligonucleotides could be post-stained by complementary oligonucleotides tagged with Cy3B or Alexa647 fluorescence dyes. This approach is similar to Fluorescence in situ hybridization (FISH). One can achieve multi-color labelling<sup>1</sup>, by choosing different oligonucleotide and PNA sequences.

Another challenge to achieve ExM-STORM is to maintain the efficiency of oxygen scavenger system<sup>4</sup>. The oxygen scavenger system, (40mM D-glucose, 0.5 mg/ml glucose oxidase (Sigma G6125), 40 µg/ml catalase (Sigma C1345), and 143 mM β-mercaptoethanol (Sigma M6250)), critically determine the quality of reconstructed STORM images. In ExM hydrogel samples are embedded in agarose gel for stabilization during imaging<sup>1</sup>, however agarose gel reduces the efficiency of the oxygen scavenger systems, and causes a reduction in blinking events and poor image quality. We found that the expanded hydrogel sample bound strongly to poly-lysine treated cover glass, (cover glasses incubated in 0.1% poly-lysine solutions for 10 minutes), possibly through strong Coulomb interactions between positive charged glass surface and negative charged poly-acrylate. Fig. 1j-k shows that while the expanded hydrogel drift about 8 µm in 8 minutes on non-coated glass, out of the camera's field of view, both the hydrogel on a poly-lysine coated glass and embedded in agarose gel drift less than 300 nm in 15 minutes, The 300-nm level drifting, which also includes thermal drift from microscope stages and sample holder, can be corrected by cross correlations images analysis and fiduciary markers.

The expansion ratio of hydrogel depends on the ionic strength of the buffered solutions (Fig. 1l). The maximum expansion is achieved in pure water. For STORM experiments, hydrogel samples are expanded directly in STORM

## ExM-STORM: Expansion Single Molecule Nanoscopy

imaging buffer (10 mM tris pH8.0, 10% glucose, and 1%  $\beta$ -mercaptoethanol). Lower cross linker concentrations lead to higher expansion factors, however gels become fragile and difficult to manipulate. Dilution of the STORM imaging buffer by 10 folds can achieve higher, 4 fold, expansion ratio; however, the activity of the oxygen systems drops quickly in low capacity buffer<sup>22</sup>. Therefore hydrogel of 0.15% cross linker concentration, which expands  $\sim 3.1$  folds in STORM imaging buffer, is recommended for most experiments.

Overcoming the photo bleaching and gel drifting, we demonstrate 2-color ExM-STORM with microtubule (green) and clathrin-coated pits (red) in U2OS cells (Fig. 1m) by using the PNA post-staining approach.

Expanding a sample by 3 folds increases the localization precision of ExM-STORM by 2.5 folds from conventional STORM. Following ref 10, we characterize the localization precision of ExM-STORM with individual AlexaFluor-647 molecules scattered in expanded hydrogels (Fig. 2). The gel expands 3.1 times. The standard deviation of multiple localizations of the same molecule,  $\sigma$ , is used as a metric to determine the localization precision; they are 3.4, 3.7, and 9.6 nm in  $x$ ,  $y$ , and  $z$  direction, respectively, representing 2.5 folds enhancement, on average, from conventional STORM, (8.0, 10.1 and 29.6 nm, respectively) (Fig. 2a-d). The resolutions of the corresponding ExM-STORM images in  $x$ ,  $y$  and  $z$  directions, measured in full-width-half-maxima (FWHM), are 8.0, 8.7, and 22.6 nm respectively; 2.5 folds higher than conventional STORM (18.8, 23.8, and 69.7 nm respectively, which are similar to or better than values reported<sup>23</sup>). The sub 10-nm lateral and 20-nm axial resolution has only been previously achieved by using dual-objective STORM<sup>10</sup>, which requires complex 4-pi configuration and is not available to most laboratories. In addition, the improved, bleaching free ExM is fully compatible with the dual-objective STORM.

Using small probes better takes advantages of the 2.5 fold enhancement of localization precision. The point-spread function (PSF) of STORM is convolution of the single molecule localization PSF and the probe:  $PSF_{\text{STORM}} = PSF_{\text{Localization}} \otimes \text{Probe}$ . If we assume both the PSF of the localization and distribution of the probe are Gaussians, the resolution of STORM is estimated to be:  $FWHM_{\text{STORM}}^2 = FWHM_{\text{Localization}}^2 + FWHM_{\text{Probe}}^2$ . Therefore, STORM benefits from ExM most, when the size of the probe is comparable to or smaller than the localization precision. The original ExM use a 40-bp long tri-functional oligonucleotide to imprint the features of interest from a sample to a hydrogel. We found that in our post hybridization approach with PNA, because PNA has higher binding affinity than DNA, the length of the oligonucleotide can be reduced to 12-bp, which is  $\sim 4$  nm in linear length.

The cross-sectional profile of microtubule is used as a standard to evaluate the resolution of STORM<sup>24</sup> (Fig. 2e-f). Microtubule has a hollow cylinder structure (Fig. 2g). When immunofluorescence is used to stain the microtubules, the antibodies bind only to the outer side of the cylinder; therefore the cross section of the image of a microtubule should be a hollow circle<sup>24</sup>. However, such hollow cross section has never been observed by STORM. While the cross section of a conventional STORM image of a microtubule exhibits a filled circle (Fig. 2h), due to low precision of localization in axial direction, ( $\sim 69$  nm, Fig. 2b), which is larger than the diameter of the microtubule, Fig. 2i shows that hollow cross section can be resolved by ExM-STORM, whose axial localization precision is  $\sim 23$  nm (Fig. 2d), smaller than the diameter of the microtubule.

## ExM-STORM: Expansion Single Molecule Nanoscopy

The lateral resolution of ExM-STORM (Fig. 2i, 12.7 and 14.8 nm in  $\sigma$ , 29.9 and 34.9 nm in FWHM) is slightly better than conventional STORM (Fig. 2h, 15.5 and 14.8 nm in  $\sigma$ , 36.5 and 33.2 nm in FWHM), due to the size of the indirect fluorescence probes consisting of a full size primary antibody and full size secondary antibodies conjugated with 12-bp oligonucleotides. From the measured cross section profile of microtubule, we estimate that the ExM-STORM increases the axial resolution by 2 folds from 68.3 nm in FWHM to ~33 nm (29.0 nm to 14.2 nm in  $\sigma$ , Fig 2h-i).

In summary, we present critical modification to ExM that circumvent the massive photo bleaching of fluorophores during the polymerization of the polymer hydrogel. While 50-100% of fluorophores are bleached in the original ExM<sup>1</sup>, bleaching is completely prevented with our methods, which allows imaging of single molecules in expanded samples. ExM-STORM increases the localization precision by 2.5 folds from conventional STORM. Most STORM experiments, which use indirect fluorescence labeling, enjoy 2 folds enhancement of the axial resolution, bringing the  $z$  resolution on par with  $x$  and  $y$  resolution. We expect that the triple enhancement of the localization precision will be fully taken advantage of by using sub 10-nm size probes, such as nanobodies. The resolution of ExM-STORM could be increased further by using dual-objective STORM<sup>10</sup> or interference detection schemes (iPALM)<sup>25</sup>.

ExM-STORM: Expansion Single Molecule Nanoscopy

## Methods

The standard ExM protocol mainly could be found from the ExM website (expansion microscopy.org). We highlight here our improvements to make ExM compatible with STORM.

### 1. DNA Oligonucleotides and Secondary Antibody Conjugation

Oligonucleotide sequence:

5'/5AmMC12/CCGAATACAAAGCATCAACGAACatctCCGAATACAAAGCATCAACGAA/3'

DNA sequences with 5' acrydite modification and 3' amine modifications (Integrated DNA Technologies) were conjugated to the antibodies (Rockland, Affinity Purified goat A-mouse IgG, 6101122) using the Solulink, Antibody Oligonucleotide All-in-One Conjugation Kit (Solulink, A9202001).

### 2. Cultured Cell Preparation and Staining

U2OS cells were cultured on 18x18-1.5 microscope cover glass (FisherScientific, Fisherbrand microscope cover glass, 12541A) in 6-well plates (corning, 3516), in RPMI supplemented with 10%FBS and 1% Penicillin Streptomycin, and grown overnight to 60% confluence in a 37C tissue culture incubator. The following solutions were made in 1x phosphate buffered saline (PBS) and the incubations carried out at room temperature. To preserve microtubule structure, cells were fixed in 3% formaldehyde and 0.1% glutaraldehyde for ten minutes, reduced with 0.1% NaBH<sub>4</sub> for 7 minutes, and quenched with 100mM glycine for 10 minutes. Cells were permeabilized with 0.2% Triton X-100 for 15 minutes at room temperature, and blocked with 5% Bovine serum albumin (BSA), 10% normal goat serum, and 0.1% Triton X100 for one hour. Samples were incubated with primary antibody (Invitrogen, mouse anti-β-tubulin, 322600, Rabbit anti-Clathrin, Abcam AB21679) at a concentration of 25μg/ml in the blocking buffer, either 4 hours at room temperature or overnight at 4C. Samples were then incubated with DNA-conjugated secondary antibodies at 25μg/ml in hybridization buffer (2x saline-sodium citrate buffer, 10% dextran sulfate, 1mg/ml yeast tRNA, and 5% goat serum), either 4 hours at room temperature or overnight at 4C.

### 3. Post-Staining With Biotin/Streptavidin

#### 3.1 Biotin conjugated tri-functional label preparation

Oligonucleotide sequence: 5'/Acryd/TTCGTTGATGCTTTGTATTCGGA/3AmMC6T

Complementary tri-functional oligonucleotide were synthesized with a 5' acrydite and a 3' amine modifications (Integrated DNA Technologies) and conjugated with NHS-ester biotin (ThermoFisher, EZ-Link NSH-Biotin, 20217) per the manufacturer's instructions. Streptavidin (New England BioLabs, Streptavidin, N7021S) was conjugated to NHS-ester Alexa647 and NHS-ester Cy3B (GE Life Sciences, Cy3B NHS Ester, PA63100) per the manufacturer's instructions.

#### 3.2 Biotin oligonucleotide labeling

## ExM-STORM: Expansion Single Molecule Nanoscopy

Samples stained with both primary antibody and secondary antibody conjugated with oligonucleotide (step 2) were incubated with biotin conjugated tri-functional oligonucleotide at a concentration of 10ng/μl in the hybridization buffer overnight at room temperature.

### 3.3 Polymerization

A monomer solution (1x PBS, 2 M NaCl, 8.63 % sodium acrylate(w/w), 2.5% acrylamide (w/w), 0.15% (w/w) N,N'-methylenebisacrylamide) was mixed with 0.2% (w/w) ammonium persulfate (APS) and 0.2% (w/w) tetramethylethylenediamine (TEMED) to promote polymerization. The monomer solution mixed with the APS and TEMED was then added to samples to a depth of 1mm and incubated for 2 hours at room temperature to allow for the completion of the polymerization process. The size of the gel is measured, which will be used to calculate the expansion ratio later.

### 3.4 Digestion and dialysis of proteinase K

1mg/ml Proteinase K (Roche, Proteinase K recombinant PCR grade, 03115879001) was added to polymerized samples in ten times volume digestion buffer (50mM Tris pH8, 1mM EDTA, 0.5% Triton X-100, 0.8M guanidine HCl) and incubated at 55C for 20 hours. Digested gels were then placed in 200 excess volumes of streptavidin binding buffer (10mM Tris, 1mM EDTA, 100mM NaCl) to dialyze proteinase K from the gels, and partially expand the gel. Dialysis was repeated with 4 washes of 45 minutes each to ensure complete removal of proteinase K.

### 3.5 Streptavidin-Alexa647/Cy3B labeling

2x gel volumes of the Alexa647/Cy3B conjugated streptavidin at a concentration of 50μg/ml in streptavidin binding buffer (10mM Tris, 1mM EDTA, 100mM NaCl) was added directly to the gel. Samples were incubated in labeling solution for 24-48 hours at room temperature.

## **4. Post-staining With PNA**

An alternative approach to the biotin/streptavidin is by using PNA probes. Multi-color imaging can be achieved by using different PNA sequences.

### 4.1 PNA probe preparation

PNA sequence:

- (a). 5'-O-TCGTTGATGCTTTGTATTCG-O-K
- (b). 5'-O-GTG CTG TCT G-O-K
- (c). 5'-O-CGC GTG TGT C-O-K

## ExM-STORM: Expansion Single Molecule Nanoscopy

Complementary PNA oligonucleotides were synthesized with a 5' amino and 3' amine modifications (PNA Bio) and conjugated with NHS-ester Alexa647 (ThermoFisher, AlexaFluor 647 NHS Ester, A37573) and Cy3B (GE Healthcare) per the manufacturer's instructions.

### 4.2 DNA oligonucleotides and secondary antibody conjugation

Oligonucleotide sequence:

- (a). 5'/Acrydt/aaCAGACAGCAC/3AmMC6T
- (b). 5'/Acrydt/aaCGAATACAAAGCATCAACGA/3AmMC6T
- (c). 5'/Acrydt/aaGACACACGCG/3AmMC6T

The single-strand DNA oligonucleotides are conjugated to secondary antibodies (Rockland, Affinity Purified goat A-mouse IgG, 6101122) using the Solulink, Antibody Oligonucleotide All-in-One Conjugation Kit (Solulink, A9202001).

### 4.3 Polymerization

A monomer solution (1x PBS, 2 M NaCl, 8.63 % sodium acrylate(w/w), 2.5% acrylamide (w/w), 0.15% (w/w) N,N'-methylenebisacrylamide) was mixed with 0.2% (w/w) ammonium persulfate (APS) and 0.2% (w/w) tetramethylethylenediamine (TEMED) to promote polymerization. The monomer solution mixed with the APS and TEMED was then added to samples to a depth of 1mm and incubated for 2 hours at room temperature to allow for the completion of the polymerization process.

### 4.4 Proteinase K digestions

1mg/ml Proteinase K (Roche, Proteinase K recombinant PCR grade, 03115879001) was added to polymerized samples in ten times volume digestion buffer (50mM Tris pH8, 1mM EDTA, 0.5% Triton X-100, 0.8M guanidine HCl, 2.9M NaCl) and incubated at 55C for 20 hours. Digested gels were then placed in 200 excess volumes of 2.9M NaCl solutions to dialyze Proteinase K from the gels. Dialysis was repeated with 4 washes of 45 minutes each to ensure complete removal of proteinase K.

### 4.5 PNA labeling

Digested and dialyzed gels were incubated with Alexa647 PNA probes. 2x gel volumes of the PNA label at a concentration of 50µg/ml in post-labeling buffer (2x saline-sodium citrate buffer, 1mg/ml yeast tRNA, and 5% goat serum) was added directly to the gel. Samples were incubated in labeling solution for 24-48 hours at room temperature.

## **5. Expansions and Electrophoresis**

Labeled samples were then placed in 500 excess gel volumes of STORM imaging buffer (10mM Tris) to allow for expansion of the gel. Expansion was conducted in imaging buffer with 4 washes of 1hour each. The expanded gel was

## ExM-STORM: Expansion Single Molecule Nanoscopy

then cut thin along the gel horizontal axis, to a thickness of approximately 1-2mm, and placed vertically in a precast 0.8% agarose gel with loading lanes 2.5-3mm in thickness. The unbound dye was removed from the gels through electrophoresis, applying 100V for 45-60 minutes. After electrophoresis, the size of the gel was measured again. By comparing the post expansion gel size with the pre-expansion gel size, we determined the expansion ratio.

## 6. Attachment of Hydrogel to Poly-L-lysine Coated Cover Glass

18x18-#1 cover glass (Fisher, Premium Cove Glass, 12548A) were coated with 500ul of 0.1mg/ml of Poly-lysine (Sigma Aldrich, Poly-L-Lysine solution, 25988630) for 10 minutes at room temperature. Coverslips were then washed with deionized water and dried overnight in a vacuum chamber. Once the coverslips were dry, expanded and electrophoresis hydrogel samples were placed onto the poly-L-lysine cover glass attaching the hydrogels for imaging.

## 7. 3D-STORM

3D-dSTORM imaging of microtubules was carried out on a Nikon Ti inverted microscope equipped with a 60X TIRF objective lens (NA 1.49). An ASI CRISP autofocus system (ASI Imaging) coupled with a 3D piezo stage (Physik Instruments) was used to lock in the focus during imaging. The maximum 639-nm laser (Coherent Genesis, 1W) or a 561nm laser (MPB Communications, 2W) was used followed by activation with 405-nm laser (Coherent OBIS) for Alexa647 and Cy3B stained samples, respectively. A custom Labview (National Instrument) program was used to control the switching between the lasers. A homemade dual-viewer was placed in front of an EMCCD (Andor iXon3, 1024<sup>2</sup> pixels) for dual color imaging. A 1.5X tube lens was used to achieve a compound magnification of 90X. A 300mm cylindrical lens (Thorlabs) is placed in front of the camera to induce astigmatism for 3D imaging.

We added to the sample an imaging buffer (10mM Tris pH8.0, 10% glucose) composed of 40mM D-glucose, 0.5 mg/ml glucose oxidase (Sigma G6125), 40 µg/ml catalase (Sigma C1345), and 143 mM β-mercaptoethanol (Sigma M6250). Single-molecule blinking events were collected from a FOV of 256×256 pixels with an integration time of 50ms for a total of about 20,000 frames. STORM images were analyzed by ThunderSTORM (GitHub thunderstorm) and MatlabSTORM (<https://github.com/ZhuangLab/matlab-storm>). Lateral drift was corrected by cross-correlations. Matlab (Mathworks) was also used for data analysis. The images are normalized by the expansion ratio that calculated from the post- and pre-expansion gel size.

## Contributions and Acknowledgements

ZT prepared the samples, collected and analyzed the data. QY set up the STORM microscope and developed the poly-lysine immobilization procedure. JA conjugated the antibodies with DNA oligonucleotides. ZH characterized the expansion ratio of hydrogel in different buffers. HC, ZT and PB designed the experiment. We thank helpful discussions with Professor Fangliang Zhang on clathrin-coated pits. The research is supported by the NIH New Innovator Award 1-

ExM-STORM: Expansion Single Molecule Nanoscopy

DP2-EB020400, RTEF Career Development Award, The Salk Innovation Grant, and Ellison Medical Foundation New Scholar in Aging Award. JA is supported by the Salk Imaging Technology Innovation Grant, Salk IT2.

## ExM-STORM: Expansion Single Molecule Nanoscopy

### Fig. 1. Bleaching Free ExM

(a). ExM imprints features of interest to an expandable polymer hydrogel network by using oligonucleotide conjugated antibodies and complementary tri-functional labeled oligonucleotides. The polymerization of the polymer network bleaches fluorophores massively. Epi-fluorescence images of microtubules stained with Alexa647 (b-d) and Cy3B (e-g). Microtubules are completely disappeared in ExM samples with Alexa647 dyes (c), and are barely visible with Cy3B dyes (f). Our bleaching-free ExM lose no signals at all for both dyes (d and g). The scale bars in the images are 1  $\mu\text{m}$ . The magnification in (d) and (g) has been normalized to account for the expansion of the gel. The high background in (f) is due to the adjustment of image contrast in order to visualize the faint microtubule fibers. (h). A bleaching-free ExM using a biotin-conjugated tri-functional label. (i). A bleaching-free ExM that allows multi-color labeling by crosslinking the oligonucleotides tagged on the antibodies directly to the polymer network; complementary PNA probes stain the oligonucleotides after the polymerization. (j). The trajectory of 40 nm red fluorescence beads in an expanded hydrogel on a normal cover glass (red) shows significant drifting of the hydrogel in a period of 8 minute, while both the trajectories of beads in similar gels on poly-lysine coated cover glass (green) or embedded in agarose gel (blue) exhibit less than 300 nm drifting in 15 minutes. (k). A zoomed in view of (j). (l) The expansion ratio vs the cross linker concentration of hydrogels are characterized in 4 buffers. The 4 curves correspond to ddH<sub>2</sub>O (black), diluted STORM imaging buffer (1 mM tris pH8.0 and 10 mM glucose, blue), normal STORM imaging buffer (10 mM tris pH8.0, 10% glucose, and 1%  $\beta$ -mercaptoethanol, green), and proteinase K digestion buffer (50 mM Tris pH8, 1 mM EDTA, 0.5% Triton X-100, 0.8 M guanidine HCl, and 2.9 M NaCl, red). (m). A 2-color ExM-STORM image of clathrin-coated pits (red) and microtubule (green) in U2OS cells. The PNA post-staining method is used.

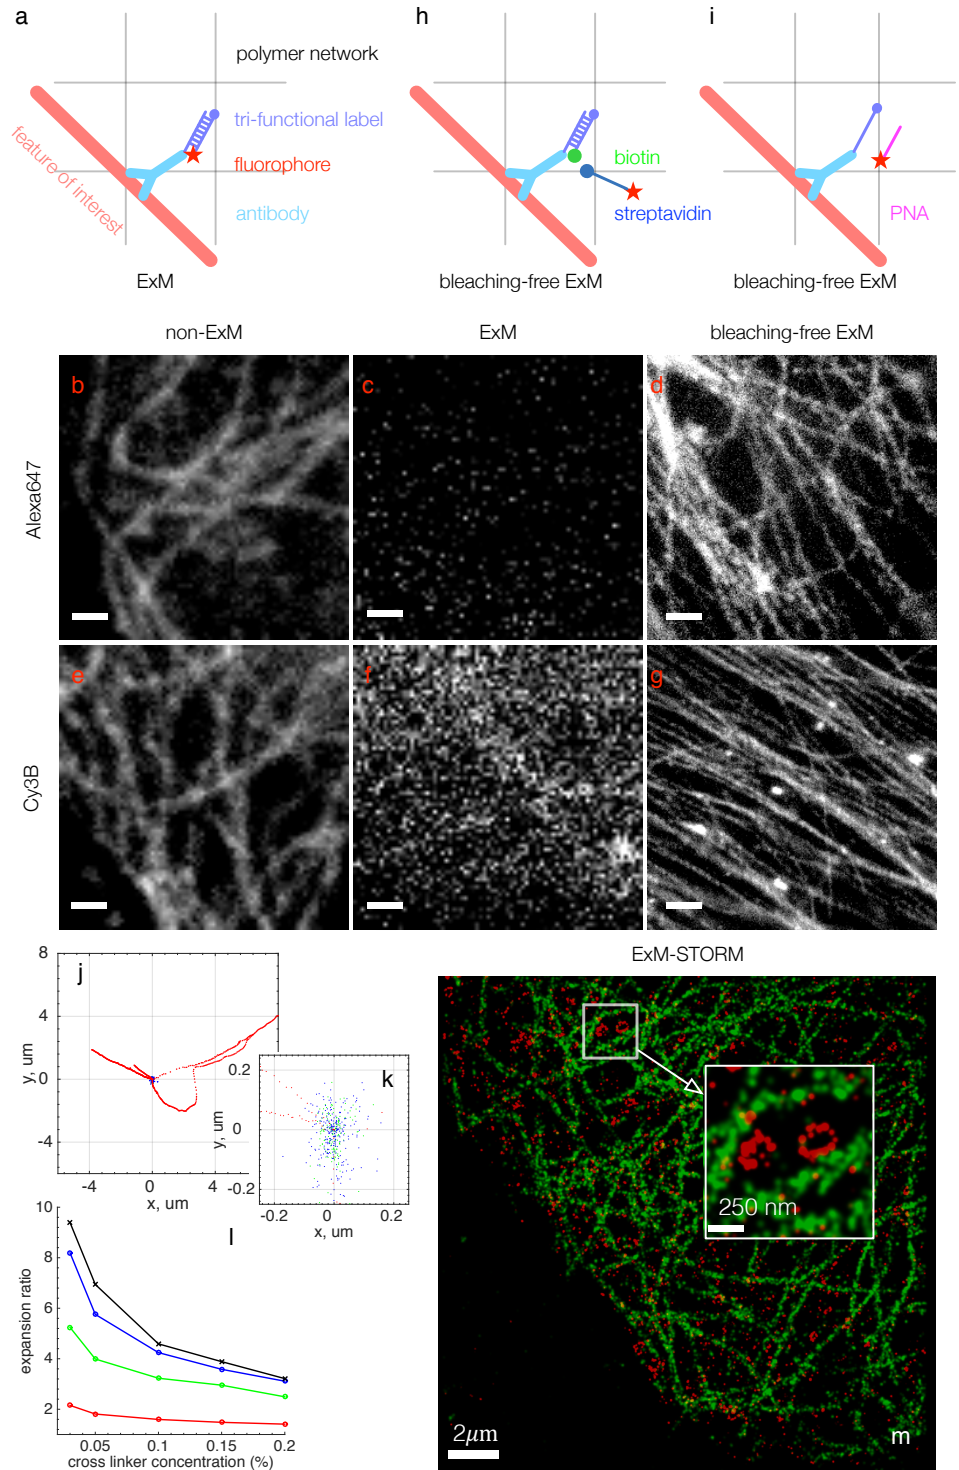

# ExM-STORM: Expansion Single Molecule Nanoscopy

**Fig. 2. ExM-STORM**

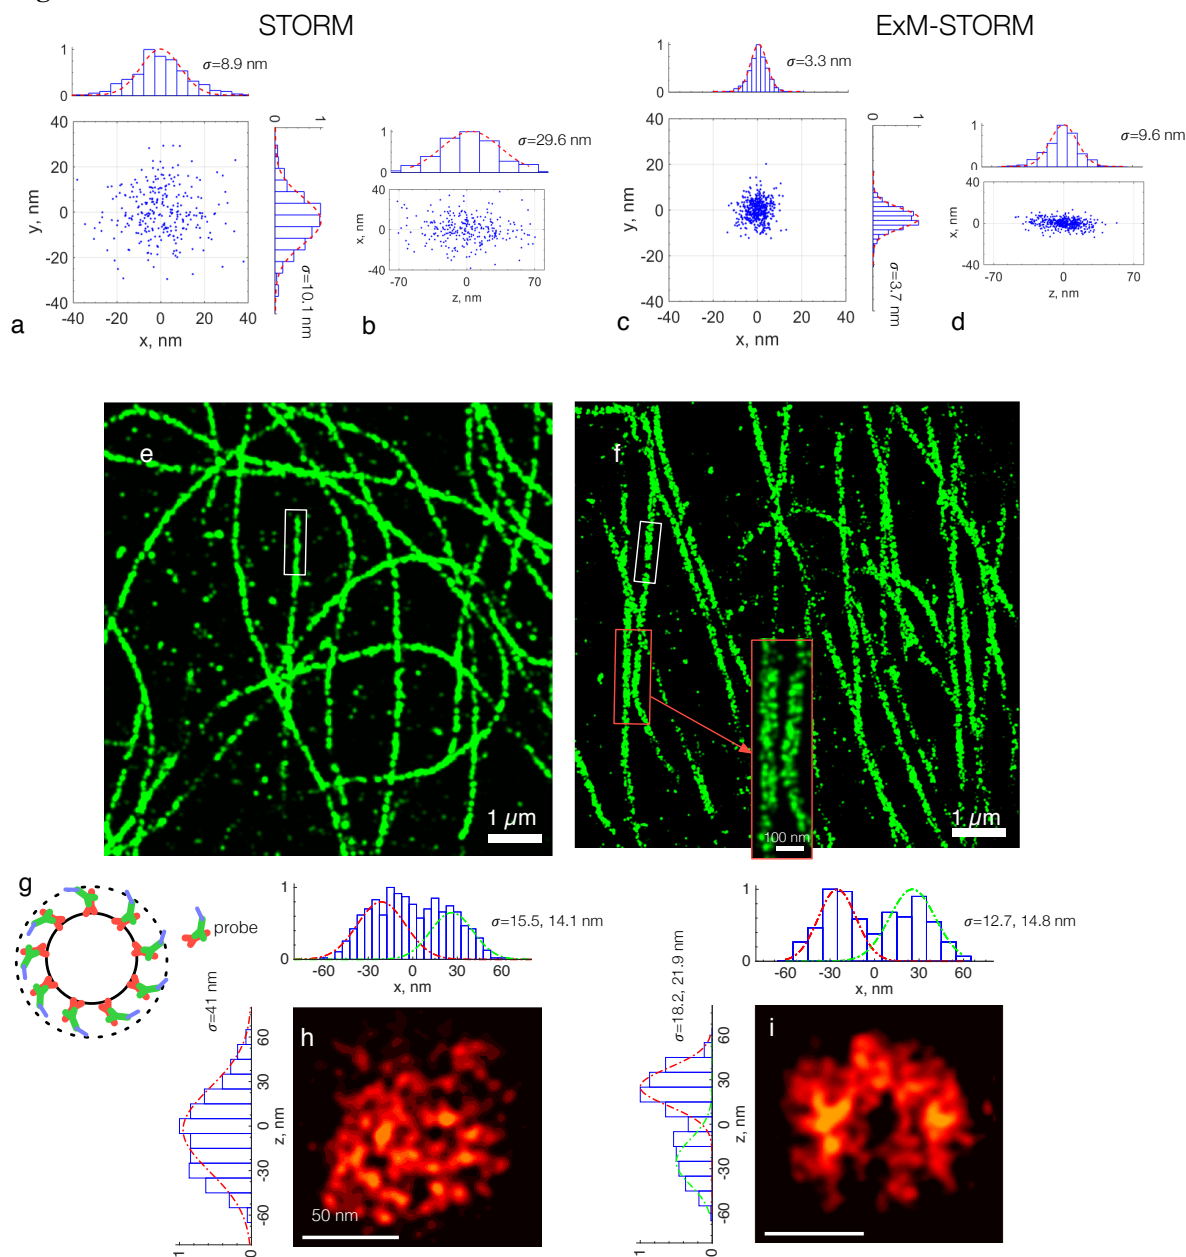

(a). Conventional STORM localization precision of Alexa Fluor 647 molecules scattered in fixed U2OS cells are plotted in 2D. Each blinking events are normalized to center at the origin, following ref. 10. The standard deviation  $\sigma$  of the distribution in  $x$  and  $y$  is 8.9 and 10.1 nm respectively. (b). The distribution of the same localization events in  $z$ - $x$  plane. The  $\sigma$  of the distribution in  $z$  is 29.6 nm. (c). Localization precision of Alexa Fluor 647 molecules scattered in an expanded gel. The  $\sigma$  of the localization events is 3.3, 3.7 and 9.6 nm in  $x$ ,  $y$ , and  $z$  (d), respectively. A STORM (e) and an ExM-STORM (f) image of microtubules in U2OS cells. The inset of (f) is a zoom in view of the region selected by the red box in (f). (g) A cartoon illustrates the hollow cross section of microtubule. (h) and (i) are the cross sections of the microtubule selected by the white boxes in (e) and (f), respectively. The histograms in (h) and (i) show profiles of the center sections of the cross sections ( $-15\text{nm} < x < 15\text{nm}$  for  $z$ , and  $-15\text{nm} < z < 15\text{nm}$  for  $x$ , respectively). The hollow cross section is visible by ExM-STORM (i) but not STORM (h).

## ExM-STORM: Expansion Single Molecule Nanoscopy

### Reference

1. Chen, F., Tillberg, P.W. & Boyden, E.S. Expansion microscopy. *Science* **347**, 543 - 548 (2015).
2. Gustafsson, M.G. Surpassing the lateral resolution limit by a factor of two using structured illumination microscopy. *Journal of microscopy* **198**, 82-87 (2000).
3. Hell, S.W. & Wichmann, J. Breaking the diffraction resolution limit by stimulated emission: stimulated-emission-depletion fluorescence microscopy. *Optics letters* **19**, 780-782 (1994).
4. Rust, M.J., Bates, M. & Zhuang, X.W. Sub-diffraction-limit imaging by stochastic optical reconstruction microscopy (STORM). *Nat Methods* **3**, 793-795 (2006).
5. Betzig, E. et al. Imaging intracellular fluorescent proteins at nanometer resolution. *Science* **313**, 1642-1645 (2006).
6. Dempsey, G.T., Vaughan, J.C., Chen, K.H., Bates, M. & Zhuang, X. Evaluation of fluorophores for optimal performance in localization-based super-resolution imaging. *Nat Methods* **8**, 1027-1036 (2011).
7. Bates, M., Huang, B., Dempsey, G.T. & Zhuang, X. Multicolor super-resolution imaging with photo-switchable fluorescent probes. *Science* **317**, 1749-1753 (2007).
8. Heilemann, M. et al. Subdiffraction-resolution fluorescence imaging with conventional fluorescent probes. *Angewandte Chemie International Edition* **47**, 6172-6176 (2008).
9. Xu, K., Zhong, G. & Zhuang, X. Actin, spectrin, and associated proteins form a periodic cytoskeletal structure in axons. *Science* **339**, 452-456 (2013).
10. Xu, K., Babcock, H.P. & Zhuang, X. Dual-objective STORM reveals three-dimensional filament organization in the actin cytoskeleton. *Nat Methods* **9**, 185-188 (2012).
11. Mlodzianoski, M.J. et al. Sample drift correction in 3D fluorescence photoactivation localization microscopy. *Optics express* **19**, 15009-15019 (2011).
12. Thompson, R.E., Larson, D.R. & Webb, W.W. Precise nanometer localization analysis for individual fluorescent probes. *Biophys J* **82**, 2775-2783 (2002).
13. Holden, S.J., Uphoff, S. & Kapanidis, A.N. DAOSTORM: an algorithm for high-density super-resolution microscopy. *Nat Methods* **8**, 279-280 (2011).
14. Hu, Y.S., Nan, X., Sengupta, P., Lippincott-Schwartz, J. & Cang, H. Accelerating 3B single-molecule super-resolution microscopy with cloud computing. *Nat Methods* **10**, 96-97 (2013).
15. Cox, S. et al. Bayesian localization microscopy reveals nanoscale podosome dynamics. *Nat Methods* **9**, 195-200 (2012).
16. Shroff, H., Galbraith, C.G., Galbraith, J.A. & Betzig, E. Live-cell photoactivated localization microscopy of nanoscale adhesion dynamics. *Nat Methods* **5**, 417-423 (2008).
17. Hu, Y.S. et al. Light-sheet Bayesian microscopy enables deep-cell super-resolution imaging of heterochromatin in live human embryonic stem cells. *Optical Nanoscopy* **2**, 7 (2013).

# ExM-STORM: Expansion Single Molecule Nanoscopy

18. Gebhardt, J.C.M. et al. Single-molecule imaging of transcription factor binding to DNA in live mammalian cells. *Nat Methods* **10**, 421-426 (2013).
19. Huang, B., Jones, S.A., Brandenburg, B. & Zhuang, X. Whole-cell 3D STORM reveals interactions between cellular structures with nanometer-scale resolution. *Nat Methods* **5**, 1047-1052 (2008).
20. Small, A. & Stahlheber, S. Fluorophore localization algorithms for super-resolution microscopy. *Nat Methods* **11**, 267-279 (2014).
21. Patterson, G., Davidson, M., Manley, S. & Lippincott-Schwartz, J. Superresolution Imaging using Single-Molecule Localization. *Annu Rev Phys Chem* **61**, 345-367 (2010).
22. Shi, X., Lim, J. & Ha, T. Acidification of the oxygen scavenging system in single-molecule fluorescence studies: in situ sensing with a ratiometric dual-emission probe. *Analytical chemistry* **82**, 6132-6138 (2010).
23. Huang, B., Wang, W., Bates, M. & Zhuang, X. Three-dimensional super-resolution imaging by stochastic optical reconstruction microscopy. *Science* **319**, 810-813 (2008).
24. Olivier, N., Keller, D., Gönczy, P. & Manley, S. Resolution doubling in 3D-STORM imaging through improved buffers. *PloS one* **8**, e69004 (2013).
25. Shtengel, G. et al. Interferometric fluorescent super-resolution microscopy resolves 3D cellular ultrastructure. *Proceedings of the National Academy of Sciences* **106**, 3125-3130 (2009).
